# 1 Glycyrrhizin inhibits LPS-induced inflammatory responses

## 2 in goat ruminal epithelial cells *in vitro*

3 Xuanxuan Pu<sup>a,1</sup>, Pattygouri Mullahred<sup>a,1</sup>, Junfeng Liu<sup>ab</sup>, Xuefeng Guo<sup>ab\*</sup>, Jian Gao<sup>c</sup>, Xiuping

4 Zhang<sup>ab</sup>, Chenyu Jiang<sup>a</sup>, Sujiang Zhang<sup>ab</sup>

5 <sup>a</sup> *College of Animal Science, Tarim University, Alar 843300, Xinjiang, PR China*

6 <sup>b</sup> *Key Laboratory of Tarim Animal Husbandry Science and Technology of Xinjiang Production*

7 *and Construction Group, Alar 843300, Xinjiang, PR China*

8 <sup>c</sup> *College of Animal Science and Technology, Yangzhou University, Yangzhou 225009, Jiangsu,*

9 *PR China*

10

11

12 <sup>1</sup>Xuanxuan Pu and Pattygouri Mullahred equally contributed to this work.

13 \* Corresponding authors.Tel.: 15299571979.

14 *Email address: gxfdky@126.com.*

15

16

17

18

19

20

21

22

## 23 **Abstract**

24           A long-term of high concentration feeding in ruminants can bring huge economic profits,  
 25 but it also impose ruminants into great threat of suffering subacute ruminal acidosis (SARA).  
 26 SARA is a kind of disease which attenuate the health, feed intake and production of ruminants,  
 27 and when ruminants suffer SARA, the concentration of lipopolysaccharide (LPS) increase largely.  
 28 Glycyrrhizin is reported to have anti-inflammation effects, and the study was conducted to  
 29 investigate effects of glycyrrhizin on LPS-induced goat ruminal epithelial cells (GRECs) to  
 30 provide evidence for using glycyrrhizin as a treatment for SARA. Effects of LPS, and glycyrrhizin  
 31 on cell viability of GRECs were investigated, respectively. Then GRECs were stimulated with  
 32 LPS (50 mg/L) for 2 h, and glycyrrhizin were added at the concentration of 0, 50, 75, 100 and 125  
 33 mg/L for 24 h to investigate the expression of inflammatory cytokines (by Elisa kits), the mRNA  
 34 expression of NF- $\kappa$ B and inflammatory cytokines (by qRT-PCR), the distribution of Zo-1 and  
 35 Occludin (by immunofluorescence staining), the expression of Occludin (by Western blot  
 36 analysis), and the morphology of GRECs. The results showed that: (1) Glycyrrhizin at the  
 37 concentration of 50, 75, 100, and 125 mg/L had no cytotoxic effects on GRECs, and LPS at the  
 38 concentration of 50 mg/L significantly decreased the cell viability of GRECs. (2) Glycyrrhizin  
 39 attenuated the expression and relative mRNA expression of TNF- $\alpha$ , IL-1 $\beta$ , IL-6, IL-8 and IL-12

by a dose-dependent manner, and significantly attenuated the relative mRNA expression of NF- $\kappa$ B. (3) Immunofluorescence staining and Western blot analysis showed that the quantity of Zo-1 and Occludin, and the expression of Occludin all increased with the treatment of glycyrrhizin. (4) Glycyrrhizin attenuated LPS-induced autophagy and protected the structural integrity of GRECs. In conclusion, glycyrrhizin significantly inhibited the inflammatory response in LPS-stimulated GRECs, and it may be used as a potential agent for the treatment of SARA.

**Key words:** glycyrrhizin; GRECs; LPS; inflammation; SARA

## Introduction

SARA has become one of the most harmful and common diseases in ruminants breeding as more concentration were fed for the growing demand of animal productions (Hong et al., 2010). Researches showed that the incidence of ruminants' SARA in Italy, Ireland, Netherlands and the United States were 33%, 13.8%, 11% and 19%-20.1%, respectively (Morgante et al., 2007; Kleen et al., 2009; Luke et al., 2008; Garrett et al., 1999). Yamamoto et al. (1993) reported that the rumen of fattening cattle was in a low acid environment for a long time when it suffered SARA, and finally led to the shedding of ruminal mucosa. Ruminal epithelium play a crucial role in defending against bacteria (Wu et al., 2013), however, SARA could damage the cell viability and barrier function of ruminal epithelial cells. Even worse, systemic inflammatory response would be aroused when toxin and inflammatory substances crossed the mucosal barrier and reached to blood circulation (Penner et al., 2010). LPS is a main toxin product of *Gram negative bacteria*, and the concentration of free LPS in the rumen increases sharply when ruminants are under SARA. LPS fastened the release of inflammatory factors such as TNF- $\alpha$ , IL-1 $\beta$  and IL-6 (Yan et

al., 2014). The mechanism of that is as follows: LPS leads to the activation of TLR4 signal pathway causing the release of inflammatory cytokines. Meanwhile, the NF- $\kappa$ B pathway, which has key regulatory functions in inflammation and innate and adaptive immunity (Rietschel et al., 1987), was also activated by LPS, and it further hastened the release of inflammatory cytokines. Histopathological change of GRECs was observed when LPS entered into rumen tissues. Autophagy, as a survival mechanism of cells in adverse environments, can remove damaged organelle and protein to protect cells (Zhu et al., 2011). Autophagy has been demonstrated to be widely involved in various disease processes, including cardiovascular disease, cancer, and neurodegenerative diseases (Lisa et al., 2012; Poon et al., 2012; Poon et al., 2012). Autophagy was also observed in GRECs when ruminants were under SARA as well. However, excessive autophagy could lead to large death of cells. Thus, we need to find agent that could prevent and treat inflammation when ruminants were under SARA.

Glycyrrhizin, isolated from licorice, has been reported to have anti-oxidative (Haraguchi et al., 1998; Vaya et al., 1997) and anti-inflammatory effects (Yamashita et al., 2017; Gonzalez-Reyes et al., 2016). Glycyrrhizin could be used to prevent some disease and to improve meat quality (Okamoto et al., 2001; Shibayama et al., 1989). Thus, we made a hypothesis that glycyrrhizin could reduce the inflammatory response in GRECs and provide treatment for SARA. But there was less research investigating on anti-inflammatory effects of glycyrrhizin on LPS-induced GRECs. Therefore, in this study, GRECs were stimulated with LPS, and the effects of glycyrrhizin in LPS-stimulated GRECs were investigated *in vitro* to provide evidence for using glycyrrhizin as a method to treat ruminants under SARA.

## Materials and Methods

### Reagents

Glycyrrhizin (purity >99%) was purchased from Yuanye Biotechnology Co., Ltd. (Shanghai, China). LPS (Escherichia coli 055:B5) was purchased from Sigma Chemical (St. Louis, MO, USA). Fetal bovine serum were purchased from Gibco (Grand Island, New York, USA). DMEM/F12 was purchased from Hyclone (Beijing, China). Anti-cytokeratin-18 IgG and FITC-goat anti mouse IgG were purchased from Santa cruz biotechnology Co., Ltd. (America). Anti-rabbit IgG H&L was purchased from Abcam (America). DAPI were purchased from Tongren institute of chemistry (Japan). Elisa kits for TNF- $\alpha$ , IL-1 $\beta$ , IL-6, IL-8 and IL-12 were gotten from Biolegend (Camino Santa Fe, CA, USA). BCA protein quantitative kit and SYBR Green PCR kit were purchased from Smer Fell Science and Technology Co., Ltd. (Shanghai, China). RIPA, Acrylamide(29:1), Tris-HCl pH=8.8 electrophoretic buffer, Tris-HCl pH=6.8 electrophoretic buffer, SDS, TEMED, PBS phosphate buffer and DEPC were purchased from JRDUN Biotechnology Co., Ltd. (Shanghai, China).  $\beta$ -actin was purchased from Tianjin Sungene Biotech Co. (Tianjin, China). Alexa Fluor 488 Labeled goat anti-rabbit IgG (H+L), DAPI, Goat anti-rabbit-HRP secondary sera, Donkey anti-goat-HRP secondary sera and Goat anti-mouse-HRP secondary sera were purchased from Biyuntian biotechnology co., Ltd. (Shanghai, China). Occludin (rabbit) and ZO-1 (rabbit) were purchased from Aobasen biotechnology co., Ltd (Beijing, China). DMEM/F12 was purchased from Hyclone (Los Angeles, USA), MiniBEST Universal RNA Extraction Kit was purchased from TaKaRa, iScript<sup>TM</sup> gDNA Clear Synthesis Kit was purchased from Bio-Rad.

## **Animals and treatment**

All experimental procedures were approved by the Animal Research Ethics Committee of Tarim University (TLMUMO-2018-10) and all experiments followed the guidelines for the care and use of laboratory animals published by the US National Institutes (2010). Goats weighed 10 kg were fed with standard laboratory diets with free access to water in the experimental station of Tarim University.

## **Cell culture, treatment and identification**

Large-scale of rumen epithelial tissues of abdominal sac were collected and mixed together from goats. Primary rumianl epithelial cells were obtained as described in previous study (Zhao et al., 2019). Primary cells were purified, and were identified by the method of cytokeratin-18 immunocytochemistry.

## **Cell viability assay**

The cell viability of LPS, and glycyrrhizin in GRECs were measured by [3-(4,5-dimethylthiazol-2-yl)-2,5-diphenyl-tetra-zoliumbromide] (MTT) assay, respectively. The GRECs were treated with 100  $\mu$ L of LPS (50 mg/L), and glycyrrhizin (0, 50, 75, 100 and 125 mg/L) for 24 h, respectively, and then 10  $\mu$ L of 5 mg/L MTT was added for 4 h. Finally, the supernatants were removed and dissolved with 150 ml of DMSO in each well. Absorbance was determined at 570 nm.

## **Inflammatory cytokines assay**

In the following assay, GRECs were stimulated with 50 mg/L of LPS for 2 h firstly, and then glycyrrhizin (0, 50, 75, 100 and 125 mg/L) were added for 24 h. Cells were centrifuged at 750 g for 20 min and the supernate was collected. The levels of TNF- $\alpha$ , IL-1 $\beta$ , IL-6, IL-8 and IL-12 were measured using Elisa kits according to the manufacturer's instruction.

## **The relative mRNA expression of NF- $\kappa$ B, TNF- $\alpha$ , IL-1 $\beta$ , IL-6, IL-8 and IL-12**

### **Primers design and synthesis**

According to the mRNA sequences of NF- $\kappa$ B, TNF- $\alpha$ , IL-1 $\beta$ , IL-6, IL-8, IL-12 and GAPDH of goats in GenBank. The primers of mRNA were designed by primer 5.0 (Wang et al., 2015; Wang et al., 2015). Primers were synthesized by JRDUN Biotechnology Co., Ltd., (Shanghai, China) as shown in Table 1.

Table 1. The primer sequence of targeted genes

| Gene                 | Primer sequences (5'-3')  | Length (bp) |
|----------------------|---------------------------|-------------|
| NF- $\kappa$ B (p65) | F: GTGTAAAGAAGCGGGACTTGG  | 203         |
| (XM_018043384.1)     | R: GCGGTTGTCAAAGATGGGATG  |             |
| TNF- $\alpha$        | F: CCACGTTGTAGCCAACATCAG  | 134         |
| (NM_001286442.1)     | R: AGATGAGGTAAAGCCCGTCAG  |             |
| IL-1 $\beta$         | F: CCACCTCCTCTCACAGGAAATG | 100         |
| (XM-013967700.2      | R: GATACCCAAGGCCACAGGAATC |             |

---

|                  |                          |     |
|------------------|--------------------------|-----|
| IL-6             | F: TACCTGGACTTCCTCCAGAAC | 245 |
| (NM_001285640.1) | R: CGAATAGCTCTCAGGCTGAAC |     |
| IL-8             | F: TCTTGGCCGCTTTCCTGCTC  | 162 |
| (XM_005681749.3) | R: TTTCGCAGTGTGGCCCACTC  |     |
| IL-12            | F: GACCAAACCTCAGCCAAAG   | 104 |
| (NM_001285700.1) | R: GACACAGATGCCCATTAC    |     |
| GAPDH            | F: GCCCTGAGGCTCTCTTCCA   | 101 |
| (XM_005680968.3) | R: GCGGATGTCGACGTCACA    |     |

---

### 133 **RNA extraction and reverse transcription**

134 GRECs were treated as mentioned above, the total RNA of cells was extracted by  
 135 MiniBEST Universal RNA Extraction Kit according to the manufacturer's instructions, and the  
 136 production was measured by 1% agarose gel. Reverse transcription was as follows: first, DNA  
 137 contamination of RNA samples was removed with a RNase-free DNase. Then cDNA was  
 138 synthesized with reference to the reverse transcription kit instructions of Dalian Biotechnology  
 139 Co., Ltd.

### 140 **qRT-PCR**

141 The reversed cDNA was diluted to 10  $\mu$ M and was subjected to qRT-PCR by SYBR Green  
 142 PCR kit according to the manufacturer's instruction. PCR was carried out in triplicate 25- $\mu$ L  
 143 reactions containing 12.5  $\mu$ L SYBRGreen Mix, 0.5  $\mu$ L upstream primer F, 0.5  $\mu$ L downstream



primer R, 9.5  $\mu$ L ddH<sub>2</sub>O, 2  $\mu$ L cDNA template. The response procedures were: 95 °C, 10 min (95 °C, 15 s; 60 °C, 45 s)  $\times$  40; 95 °C, 15 s; 60 °C, 1 min; 95 °C, 15 s; 60 °C, 15 s.

## **The distribution and quantity of Occludin and Zo-1**

The distribution and quantity of Occludin and Zo-1 was measured by immunofluorescence staining. GRECs were treated as mentioned above, the slides of GRECs were washed with 0.02 M PBS in the culture plate, fixed by 4% paraformaldehyde for 30 min, permeabilized by 0.1% Triton X-100, blocked by 1% bovine serum albumin (BSA) for 1 h, and each step followed three times washing by 0.02 M PBS. Cell slides was incubated overnight at 4°C in a wet box with a specific primary antibody (1:50), and cell slides were washed by 0.02 M PBS for three times. Then cell slides were incubated in a wet box at room temperature for 1 h with the added secondary antibody labeled with fluorescein isothiocyanate (1:500), and then washed by 0.02 M PBS for three times, and afterwards were sealed by adding anti-queching seal tablets and DAPI at a 1:500 ratio, stored in a -20 °C, and photographed by a fluorescence microscope.

## **Western blot analysis**

Approximately  $5 \times 10^5$  GRECs (treated as mentioned above) of each group were added into Lysate with protease and phosphatase inhibitors at 4 °C to disrupt cells thoroughly, cuffed the cells into a 1.5 mL EP tube and heated them at 95 °C for 10 min, centrifuged at 12000 g for 10 min, then the supernate was collected and the protein was quantified by the standard curve (the standard curve was measured In our study). The proteins were separated by SDS/PAGE and electrophoretically transferred onto a semi-dry rotating membrane. The membrane was blocked in NaCl/Tris containing 5% nonfat dry milk at room temperature for 1 h, and incubated with a

primary antibody at 4 °C for 12 h and then incubated with a secondary antibody at 37 °C for 1 h.

Finally, the blots were developed with the ECL Plus Western Blotting Detection System (GE Healthcare, Chalfont St Giles, UK).

## **Morphology change of LPS-induced GRECs**

To further identify anti-inflammatory effects of glycyrrhizin, the morphology of GRECs was investigated as well. GRECs treated as mentioned above were washed by PBS, resuspended and sealed by 2.5% glutaraldehyde for 2 h and washed by PBS for three times. Then tissues were sealed by osmic acid for 2.5 h and washed by PBS for three times. Tissues were dehydrated with different concentration ethanol of 30%, 50%, 70%, 90%, 95% and 100%, each dehydration lasted for 10-15 min for three times. Then tissues were replaced with propylene epoxide for two times, each time last for 10 min. Tissues were permeated by propylene oxide and epon resinand at a 2:1 ratio and by propylene oxide and epon resinand at a 1:2 ratio for 2 h, respectively, then tissues were permeated by whole epon resinand for the night. Tissues were polymerized at 37 °C for 12 h, 45 °C for 24 h and 60 °C for 48 h, and finally, the tissues were made into cell slice and observed by electron microscopic.

## **Statistical analysis**

All data was presented as the means  $\pm$  S.E.M by SPSS 16.0. Difference were performed by one-way ANOVA combined with Turkey's multiple comparison tests. Differences were considered to be significant at  $P < 0.05$  (\*), extremely significant at  $P < 0.01$  (\*\*).

## **Results**

## **The cytokeratin-18 expression of cells**

The purified epithelial cells were identified by the detection of cytokeratin-18, and the result was shown in Fig. 1. Green fluorescence was showed in our result, and the positive staining for cytokeratin-18 indicated that the purified ruminal epithelial cells were GRECs.

## **Effects of LPS and glycyrrhizin in cell viability of GRECs**

As shown in Fig. 2, the cell viability in groups added with glycyrrhizin at the concentration of 50, 75, 100 and 125 mg/L had no significant difference versus control group. The cell viability of GRECs stimulated by LPS was significantly decreased.

## **Effects of glycyrrhizin on inflammatory cytokines in LPS-induced GRECs**

As shown in Fig. 3, the production of TNF- $\alpha$ , IL-1 $\beta$ , IL-6, IL-8 and IL-12 in LPS group were extremely significant higher than those with the treatment of glycyrrhizin ( $P<0.01$ ). Glycyrrhizin at the concentration of 50, 75, 100 and 125 mg/L inhibited the production of cytokines by a dose-dependent manner.

## **Effects of glycyrrhizin on the relative mRNA expression of NF- $\kappa$ b, TNF- $\alpha$ , IL-1 $\beta$ , IL-6, IL-8 and IL-12 in LPS-induced GRECs**

As shown in Fig. 4, glycyrrhizin at the concentration of 50, 75, 100 and 125 mg/L inhibited the mRNA expression of TNF- $\alpha$ , IL-1  $\beta$ , IL-6, IL-8 and IL-12 in LPS group by a dose-dependent manner ( $P<0.01$ ). Glycyrrhizin added at the concentration of 75, 100 and 125 mg/L decreased the mRNA expression of NF- $\kappa$ b significantly.

## **Effects of glycyrrhizin on the distribution of Zo-1 and Occludin in LPS-induced GRECs**

The distribution of Occludin and Zo-1 in GRECs was detected by immunofluorescence staining. As shown in Fig. 5, glycyrrhizin increased the quantity of Occludin and Zo-1 versus control group, and their distribution became more uniform with higher concentration of glycyrrhizin.

## **Effects of glycyrrhizin on the expression of Occludin in LPS-induced GRECs**

As shown in Fig. 6(A-B), the expression of Occludin in LPS group was extremely significant lower than those with the treatment of glycyrrhizin ( $P<0.01$ ), and the expression of Occludin increased with the treatment of glycyrrhizin by a dose-dependent manner.

## **Effect of glycyrrhizin on the morphology of LPS-induced GRECs**

As shown in Fig. 7A, LPS group was with high electron density in cytoplasm, the autophagy around the nucleus were the highest and most of it was with high electron density. As shown in Fig. 7C, Fig. 7D and Fig. 7E, the pathological changes were reduced with added glycyrrhizin. The autophagy around the nucleus occurred significantly in LPS group, while its quantity decreased significantly in Fig. 7C, Fig. 7D and Fig. 7E. What's more, the autophagy with high electron density was decreased with glycyrrhizin by a dose-dependent manner as shown in Fig. 7C, Fig. 7D and Fig. 7E. Thus better cellular morphology of GRECs was founded with higher treatment of glycyrrhizin.

## **Discussion**

## **Cell viability of glycyrrhizin in GRECs**

When ruminants were under SARA, the rumen mucosal barrier was impaired, and the content of LPS increased sharply (Rodríguez-Lecompte et al., 2014; Khafipour et al., 2009). The mRNA expression of inflammatory cytokines was increased significantly in LPS-induced ruminal epithelium of dairy cattle (Zhang et al., 2016). The tight connection between GRECs was destroyed (Liu et al., 2013), and the inflammatory cytokines would enter into the rumen leading to rumen diseases such as rumen acidosis and the death of the ruminants. Glycyrrhizin which has anti-inflammatory effects in many disease may be used as a potential anti-inflammatory agent for the treatment of SARA. Wang et al (2017) showed that glycyrrhizin at the concentration of 50, 100, and 200 µg/ml had no cytotoxic effects on mouse endometrial epithelial cells. In our assay, glycyrrhizin (0-125 mg/L) had no cytotoxic effects on GRECs as well.

## **Effects of glycyrrhizin in LPS-induced GRECs**

It has been reported that glycyrrhiza glabrathe had anti-inflammatory and antiviral effects (Uto et al., 2012). Glycyrrhizin has been reported to inhibit LPS-induced inflammatory cytokines in many cells (Wang et al., 2017; Li et al 2010). Fei et al., (2014) showed that glycyrrhizin decreased the content of TNF- $\alpha$  and IL-6 significantly in caerulein-induced acute pancreatitis of mice. Kong et al., (2019) showed that glycyrrhizin decreased the content of IL-4 and IL-6 a lot in LPS-induced acute lung injury of mice. Fu et al., (2014) reported glycyrrhizin inhibited the expression of factor- $\alpha$  and IL-6 *in vitro*. Similarly, in our study, glycyrrhizin dose-dependently inhibited the production of TNF- $\alpha$ , IL-1 $\beta$ , IL-6, IL-8 and IL-12.

NF- $\kappa$ B is considered to be an important pathogenic factor in many acute and chronic inflammatory diseases (Wullaert et al., 2011), and the activation of NF- $\kappa$ B is a central link in inflammatory reaction. NF- $\kappa$ B signaling pathway could regulate transcription of inflammatory cytokines (Oeckinghaus et al., 2009). When NF- $\kappa$ B was activated by LPS, the expression of inflammatory cytokines increased (Bruewer et al., 2003; Wellnitz et al., 2011), and these inflammatory cytokines could further activate NF- $\kappa$ B. Stimulating ruminal epithelial cells with LPS could lead to the activation of NF- $\kappa$ B signaling pathway (Schaefer et al., 2004), and in our study, LPS at the concentration of 50 mg/L had significantly decreased the cell viability of GRECs. but Strandberg et al., (2005) showed that LPS of 50 mg/L had no significant effect on bovine primary mammary epithelial cells. Wellnitz et al., (2004) reported that 200 mg/L LPS could affect the primary mammary epithelial cells of Holstein cows. This difference might be caused by the difference of animals and method used. In our study, the results showed that glycyrrhizin dose-dependently inhibited the relative mRNA expression of NF- $\kappa$ B, TNF- $\alpha$ , IL-1 $\beta$ , IL-6, IL-8 and IL-12, which indicate that the inhibition of NF- $\kappa$ B signaling pathway might lead to the decreased production of inflammatory cytokines, and it needs further investigation. TNF- $\alpha$  is an anti-tumor multi-function factor and large amounts of TNF- $\alpha$  can cause serious inflammatory reactions like tissue necrosis. Research showed that TNF- $\alpha$  could inhibit the expression of Occludin largely (Song et al., 2004; Bruewer et al., 2003; Xu et al., 2010). Therefore, if the expression of Occludin was increased in LPS-induced GRECs, it could further identify the anti-inflammatory effects of glycyrrhizin.

To further identify anti-inflammatory effects of glycyrrhizin, the distribution of tight junction proteins and the expression of Occludin were investigated in our study. The rumen

epithelium from mucous layer to serosa layer was stratum corneum, stratum granulosum, stratum spinosum and stratum basale which play an important role in protection. There are tight connection proteins in stratum granulosum and they play an important role in maintaining rumen barrier function (Harhaj et al., 2004; Steele et al., 2011). The tight junction proteins are composed of Claudin, Occludin, Zo-1, ZO2 and so on. Sun et al., (2018) reported that when the epithelial cells were under SARA, rumen epithelium and the mRNA expression of tight junction were affected by LPS *in vitro*. When the ruminal epithelial cells were induced by LPS, the tight junction proteins were destroyed, and the cell gap became larger. In our study, the distribution of Occludin and Zo-1 became uniform and their quantity increased with the treatment of glycyrrhizin. What's more, glycyrrhizin dose-dependently increased the expression of Occludin. The results further identified anti-inflammatory effects of glycyrrhizin in LPS-induced GRECs.

In our study, there was autophagy occurred in LPS-induced GRECs. Autophagy can be induced by many factors (Chen et al., 2008; Wang et al., 2010). Xu et al., (2006) reported that LPS could induce macrophages to produce autophagy. Abnormal activation of autophagy is closely associated with the development of acute pancreatitis (Kang et al., ;Zhang et al., 2011). In our study, glycyrrhizin attenuated the LPS-induced autophagy and dose-dependently decreased the autophagy with high electron density. Therefore, glycyrrhizin inhibited the abnormal activation of autophagy in LPS-induced GRECs.

Taken together, glycyrrhizin dose-dependently inhibited LPS-induced inflammatory response in our study. Therefore, higher concentration of glycyrrhizin should be investigated for further study to identify the upper limit concentration of glycyrrhizin.

## Conclusion

Glycyrrhizin (0-125 mg/L) had no cytotoxic effects on GRECs, and LPS significantly decreased the cell viability of GRECs. Glycyrrhizin inhibited the inflammation response in LPS stimulated GRECs by a dose-dependent manner by inhibiting the expression of inflammatory cytokines, suppressing NF- $\kappa$ B signaling pathway, increasing the expression of Occludin and reducing autophagy in LPS-induced GRECs. The comprehensive results showed that glycyrrhizin might be a valuable agent for the treatment of SARA.

## Conflict of interest statement

All authors declare that they have no conflict of interest.

## Author contributions

Contributed reagents/materials/analysis/ tools: X.G.; Performed the experiments: X.P; Analyzed the data: X.P; Writing- original draft: X.P.; Writing–review editing: X.P., X.G., C.J., J.L., X.Z., and S.Z..

## Acknowledgments

We acknowledge Dr Long Cheng from the University of Melbourne for useful discussion. This work was supported by the Project of Mr. Yang Sheng's Student Community Research (2016A20006) and Xinjiang Production and Construction Group with the young and middle-aged innovation talents fund (2016BC001).

## Reference



306 Bruewer, M., Luegering, A., Kucharzik, T., Parkos, C., Madara, J., Hopkins, A., Nusrat, A., 2003.  
307 Proinflammatory Cytokines Disrupt Epithelial Barrier Function by Apoptosis-Independent  
308 Mechanisms. *Journal of Immunology*. 171, 6164-6172.

309 Chen, Y., Gibson, S.B., 2008. Is mitochondrial generation of reactive oxygen species a trigger for  
310 autophagy?. *Autophagy*. 4, 246-248.

311 Fei, K., Liang, Z., Ku, H., 2014. The effect and mechanism of Saponins of Radix Glycyrrhiza in  
312 mice with acute pancreatitis. *Chinese Journal of Modern Medicine*. 24, 26-29.

313 Fu, Y.H., Zhou, E.S., Wei, Z.K., Liang, D.J., Wang, W., Wang, T.C., Guo, M.Y., Zhang, N.S.,  
314 Yang, Z.T., 2014. Glycyrrhizin inhibits the inflammatory response in mouse mammary  
315 epithelial cells and a mouse mastitis model. *FEBS Journal*. 281, 2543-2557.

316 Guide for the Care and Use of Laboratory Animals -8th ed[M]. National academis press. 2010.

317 Garrett, E.F., Pereira, M.N., Nordlund, K.V., Armentano, L.E., Goodger, W.J., Oetzel, G.R., 1999.  
318 Diagnostic methods for the detection of subacute ruminal acidosis in dairy cows. *Journal of*  
319 *Dairy Science*. 82, 1170-1178.

320 Gonzalez-Reyes, S., Santillan-Cigales, J.J., Jiménez-Osorio, A.S., Pedraza-Chaverri, J.,  
321 Guevara-Guzman, R., 2016. Glycyrrhizin ameliorates oxidative stress and inflammation in  
322 hippocampus and olfactory bulb in lithium/pilocarpine induced status epilepticus in rats.  
323 *Epilepsy Res*. 126, 126-133.

324 Haraguchi, H., Ishikawa, H., Mizutaki, K., et al., 1998. Antioxidative and superoxide scavenging  
325 activities of retrochalcones in Glycyrrhiza inflata *Bioorg. Med Chem*. 6, 339-347.

326 Harhaj, S., Antonetti, A., 2004. Regulation of tight junctions and loss of barrier function in  
327 pathophysiology. *The International Journal of Biochemistry and Cell Biology*. 36, 1206.

328 Hu, H., Lu, D., Liu, D., Shan, D., Li, S., Zhang, C., Shi, Y., 2010. Effects of Different Dietary  
329 NFC/NDF Ratios on Ruminal pH, VFA and Lactate Content in Dairy Goats. *Animal*  
330 *Husbandry & Feed Science*. 22, 595-601.

331 Kang, R., Livesey, K.M., Zeh, H.J 3rd., Lotze, M.T., Tang, D., 2011. Metabolic regulation by  
332 HMGB1-mediated autophagy and mitophagy. *Autophagy*. 7(10), 1256-1258.

333 Khafipour, E., Krause, D.O., Plaizier, J.C., 2009. Alfalfa pellet-induced subacute ruminal acidosis  
334 in dairy cows increases bacterial endotoxin in the rumen without causing inflammation. *J*  
335 *Dairy Sci*. 92(4), 1712-24.

336 Kleen, J.L., Hooijer, G.A., Rehage, J., Noordhuizen, J.P., 2009. Subacute ruminal acidosis in  
337 Dutch dairy herds. *Vet Rec*. 164, 681-683.

338 Kong, Delei., Wang, Zanfeng., Tian, Jie., Liu, Tingwei., Zhou, Hui., 2019. Glycyrrhizin  
339 inactivates toll-like receptor (TLR) signaling pathway to reduce lipopolysaccharide-induced  
340 acute lung injury by inhibiting TLR2. *Journal of Cellular Physiology*. 234, 4597-4607.

341 Li, X.H., Qi, Y., Cai, R.L., Liu, B., Song, Y., Xie, Z., 2010. Studies on the Anti-inflammatory  
342 Mechanism of Total Saponins of Radix Glycyrrhiza in Vitro. *Chinese Journal of*  
343 *Experimental Prescriptions*. 16(05), 110-113.

344 Liu, J.H., Xu, T.T., Liu, Y.J., Zhu, W.Y., Mao, S.Y., 2013. A high-grain diet causes massive  
345 disruption of ruminal epithelial tight junctions in goats. *Am J Physiol Regul Integr Comp*  
346 *Physiol.* 305(3), R232-R41.

347 Lisa, J.M., 2012. Functional Variant in the Autophagy-Related 5 Gene Promotor is Associated  
348 with Childhood Asthma. *PLoS ONE.* 7, e33454.

349 Luke, O'Grady., Michael, L.D., Finbar, J.M., 2008. Subacute ruminal acidosis (SARA) in grazing  
350 Irish dairy cows. *Veterinary journal.* 44-49.

351 Morgante, M., Stelletta, C., Berzaghi, P., Ganesella, M., Andrighetto, I., 2007. Subacute rumen  
352 acidosis in lactating cows: an investigation in intensive Italian dairy herds. *Journal of Animal*  
353 *Physiology and Animal Nutrition.* 91, 226-234.

354 Oeckinghaus, A., Ghosh, S., 2009. The NF-kappaB family of transcription factors and its  
355 regulation. *Academic Psychology Bulletin.* 1, a000034.

356 Okamoto, T., Kajino, K., Hino, O., 2001. Hepatoprotective drugs for the treatment of  
357 virus-induced chronic hepatitis: from hypercarcinogenic state to hypocarcinogenic state. *Jpn*  
358 *JpHarmacol.* 11, 177-180.

359 Penner, G.b., Oba, M., Gäbel, G., Aschenbach, J.R., 2010. A single mild episode of subacute  
360 ruminal acidosis does not affect ruminal barrier function in the short term. *Journal of Dairy*  
361 *Science.* 93, 4838-4845.

362 Poon, A.H., Chouiali, F., Tse, S.M., Litonjua, A.A., Hussain, S.N.A., Baglole, C.J., Eidelman,  
363 D.H., Olivenstein, R., Martin, J.G., Weiss, S.T., Hamid, Q., Laprise, C., 2012. Genetic and

364 histologic evidence for autophagy in asthma pathogenesis(Letter). Journal of Allergy and  
365 Clinical Immunology. 129, 569-571.

366 Poon, A., Eidelman, D., Laprise, C., Hamid, Q., 2012. ATG5, autophagy and lung function in  
367 asthma. Autophagy. 8, 694-695.

368 Rietschel, E.T., Brade, H., Brade, L., Brandenburg, K., Schade, U., Seydel, U., Zhringer, U.,  
369 Galanos, C., Lüderitz, O., Westphal, O., et al., 1987. Lipid A, the endotoxic center of  
370 bacterial lipopolysaccharides: relation of chemical structure to biological activity. Progress in  
371 Clinical and Biological Research. 25-53.

372 Rodríguez-Lecompte, J.C., Kroeker, A.D., Ceballos-Márquez, A., Li, S., Plaizier, J.C., Gomez,  
373 D.E., 2014. Evaluation of the systemic innate immune response and metabolic alterations of  
374 nonlactating cows with diet-induced subacute ruminal acidosis. J Dairy Sci. 97(12),  
375 7777-7787.

376 Schaefer, T., Desouza, K., Fahey, J., Beagley, K., Wira, C., 2004. Toll-like receptor (TLR)  
377 expression and TLR-mediated cytokine/chemokine production by human uterine epithelial  
378 cells. Immunology. 112, 428-436.

379 Shibayama, Y., 1989. Prevention of hepatotoxic responses to chemicals by glycyrrhizin in rats.  
380 Exp Mol Pathol. 51, 48.

381 Song, H., Lv, S., Ma, L., Li, Y., Liu, P., 2004. Effect of TNF- $\alpha$  on tight junctions between the  
382 epithelial cells of intestinal mucosal barrier. Chinese Digestive Journal of the World. 6,  
383 49-52.

384 Steele, M.A., Croom, J., Kahler, M., AlZahal, O., Hook, S.E., Plaizier, K., McBride, B.W., 2011.

385 Bovine rumen epithelium undergoes rapid structural adaptations during grain-induced

386 subacute ruminal acidosis. *Am J Physiol Regul Integr Comp Physiol.* 300, R1515-R1523.

387 Strandberg, Y., Gray, C., Vuocolo, T., Donaldson, L., Broadway, M., Tellam, Ross., 2005.

388 Lipopolysaccharide and lipoteichoic acid induce different innate immune responses in bovine

389 mammary epithelial cells. *Cytokine.* 31, 72-86.

390 Sun, Y., Gao, M., Xu, M., Li, S., Li, Y., Li, C., 2018. Interaction Effects of pH and

391 Lipopolysaccharide or Histamine on mRNA Expression Levels of Tight Junction Proteins of

392 Rumen Epithelium of Dairy Goats in Vitro. *Journal of Animal Nutrition.* 30, 1816-1826.

393 Uto, T., Morinaga, O., Tanaka, H., Shoyama, Y., 2012. Analysis of the synergistic effect of

394 glycyrrhizin and other constituents in licorice extract on lipopolysaccharide-induced nitric oxide

395 production using knock-out extract. *Biochem Biophys Res Commun.* 417, 473-478.

396 Vaya, J., Belinky, P., Aviram, M., 1997. Antioxidant constituents from licorice roots: isolation,

397 structure elucidation and antioxidative capacity toward LDL oxidation. *Free Radic Biol Med.*

398 23, 302-313.

399 Wang, H., Zhao, H., Sui, Y., et al., 2015. Effect of Lipopolysaccharide on the Expression of TLR2

400 and TLR4 in Intestinal Mucosa Microvascular Endothelial Cells. *China Agricultural Bulletin.*

401 31, 72-77.

402 Wang, L., Dong, Z., Huang, B., et al., 2010. Distinct patterns of autophagy evoked by two

403 benzoxazine derivatives in vascular endothelial cells. *Autophagy.* 6, 1115-1124.

404 Wang, T., 2015. Effect of rumen histamine on inflammatory pathway of rumen epithelial cells in  
405 cattle with subacute rumen acidosis. Jilin University.

406 Wang, X., Hao, H., Chu, L., 2017. Glycyrrhizin inhibits LPS-induced inflammatory mediator  
407 production in endometrial epithelial cells. Microbial Pathogenesis. 109, 110-113.

408 Wellnitz, O., Arnold, E.T., Bruckmaier, R.M., 2011. Lipopolysaccharide and lipoteichoic acid  
409 induce different immune responses in the bovine mammary gland. Dairy Sci. 94, 5405-12.

410 Wellnitz, O., Kerr, D.E., 2004. Cryopreserved bovine mammary cells to model epithelial response  
411 to infection[J]. Vet Immunol Immunopathol. 101, 191-202.

412 Wullaert, A., Bonnet, M.C., Pasparakis, M., 2011. NF- $\kappa$ B in the regulation of epithelial  
413 homeostasis and inflammation. Cell Res. 21, 146-158.

414 Wu Y., 2013. Effects of subacute rumen acidosis on proliferation and apoptosis of rumen and  
415 valvular epithelial cells. Agricultural University Of The Inner Mongol.

416 Xu, L., Sun, D., Zhang, Y., Zhang, Z., Li, X., 2010. Relationship between occludin expression in  
417 intestinal epithelial cells and tumor necrosis factor- $\alpha$  level in rats with nonalcoholic fatty liver  
418 disease. Chinese Digestive Journal of the World. 18, 981-986.

419 Xu, Y., Kim, S.O., Li, Y., et al., 2006. Autophagy Contributes to Caspase-independent  
420 Macrophage Cell Death. The Journal of Biological Chemistry. 281, 19179-19187.

421 Yamamoto Y, Kitamura N, Yamada J, Yamashita T (1993) Three-Dimensional Architecture of the  
422 Subepithelial Connective Tissue in the Omasal Laminae of Sheep and Cattle. Cells Tissues  
423 Organs 146, 238-243.

424 Yamashita, T., Asano, Y., Taniguchi, T., Nakamura, K., Saigusa, R., Miura, S., et al., 2017.

425 Glycyrrhizin ameliorates fibrosis, vasculopathy, and inflammation in animal models of

426 systemic sclerosis. *Investig. Dermatol.* 137, 631-640.

427 Yan, Z., 2014. Effect, Mechanism and function Analysis of LPS treatment on FTO expression in

428 Broiler chickens. Agricultural University Of Nanjing.

429 Zhang, R., Zhu, W., Mao, S., 2016. High-concentrate feeding upregulates the expression of

430 inflammation-related genes in the ruminal epithelium of dairy cattle. *J Anim Sci Biotechnol.*

431 29, 7:42.

432 Zhang, Y., Yang, J.W., Ren, X., Yang, J.M., 2011. NAC1 and HMGB1 enter a partnership for

433 manipulating autophagy. *Autophagy*.7(12), 1557-1558.

434 Zhao, C., 2019. The mechanism of inflammation of rumen and the changes of rumen epithelial

435 SLC22A transporter proteins in dairy cows with SARA. Jilin University, Ph.D. thesis, China.

436 Zhu, J., Tan, X.R., 2011. Research advances in ROS and autophagy. *Life sciences.* 10, 987—992.

437

438

439



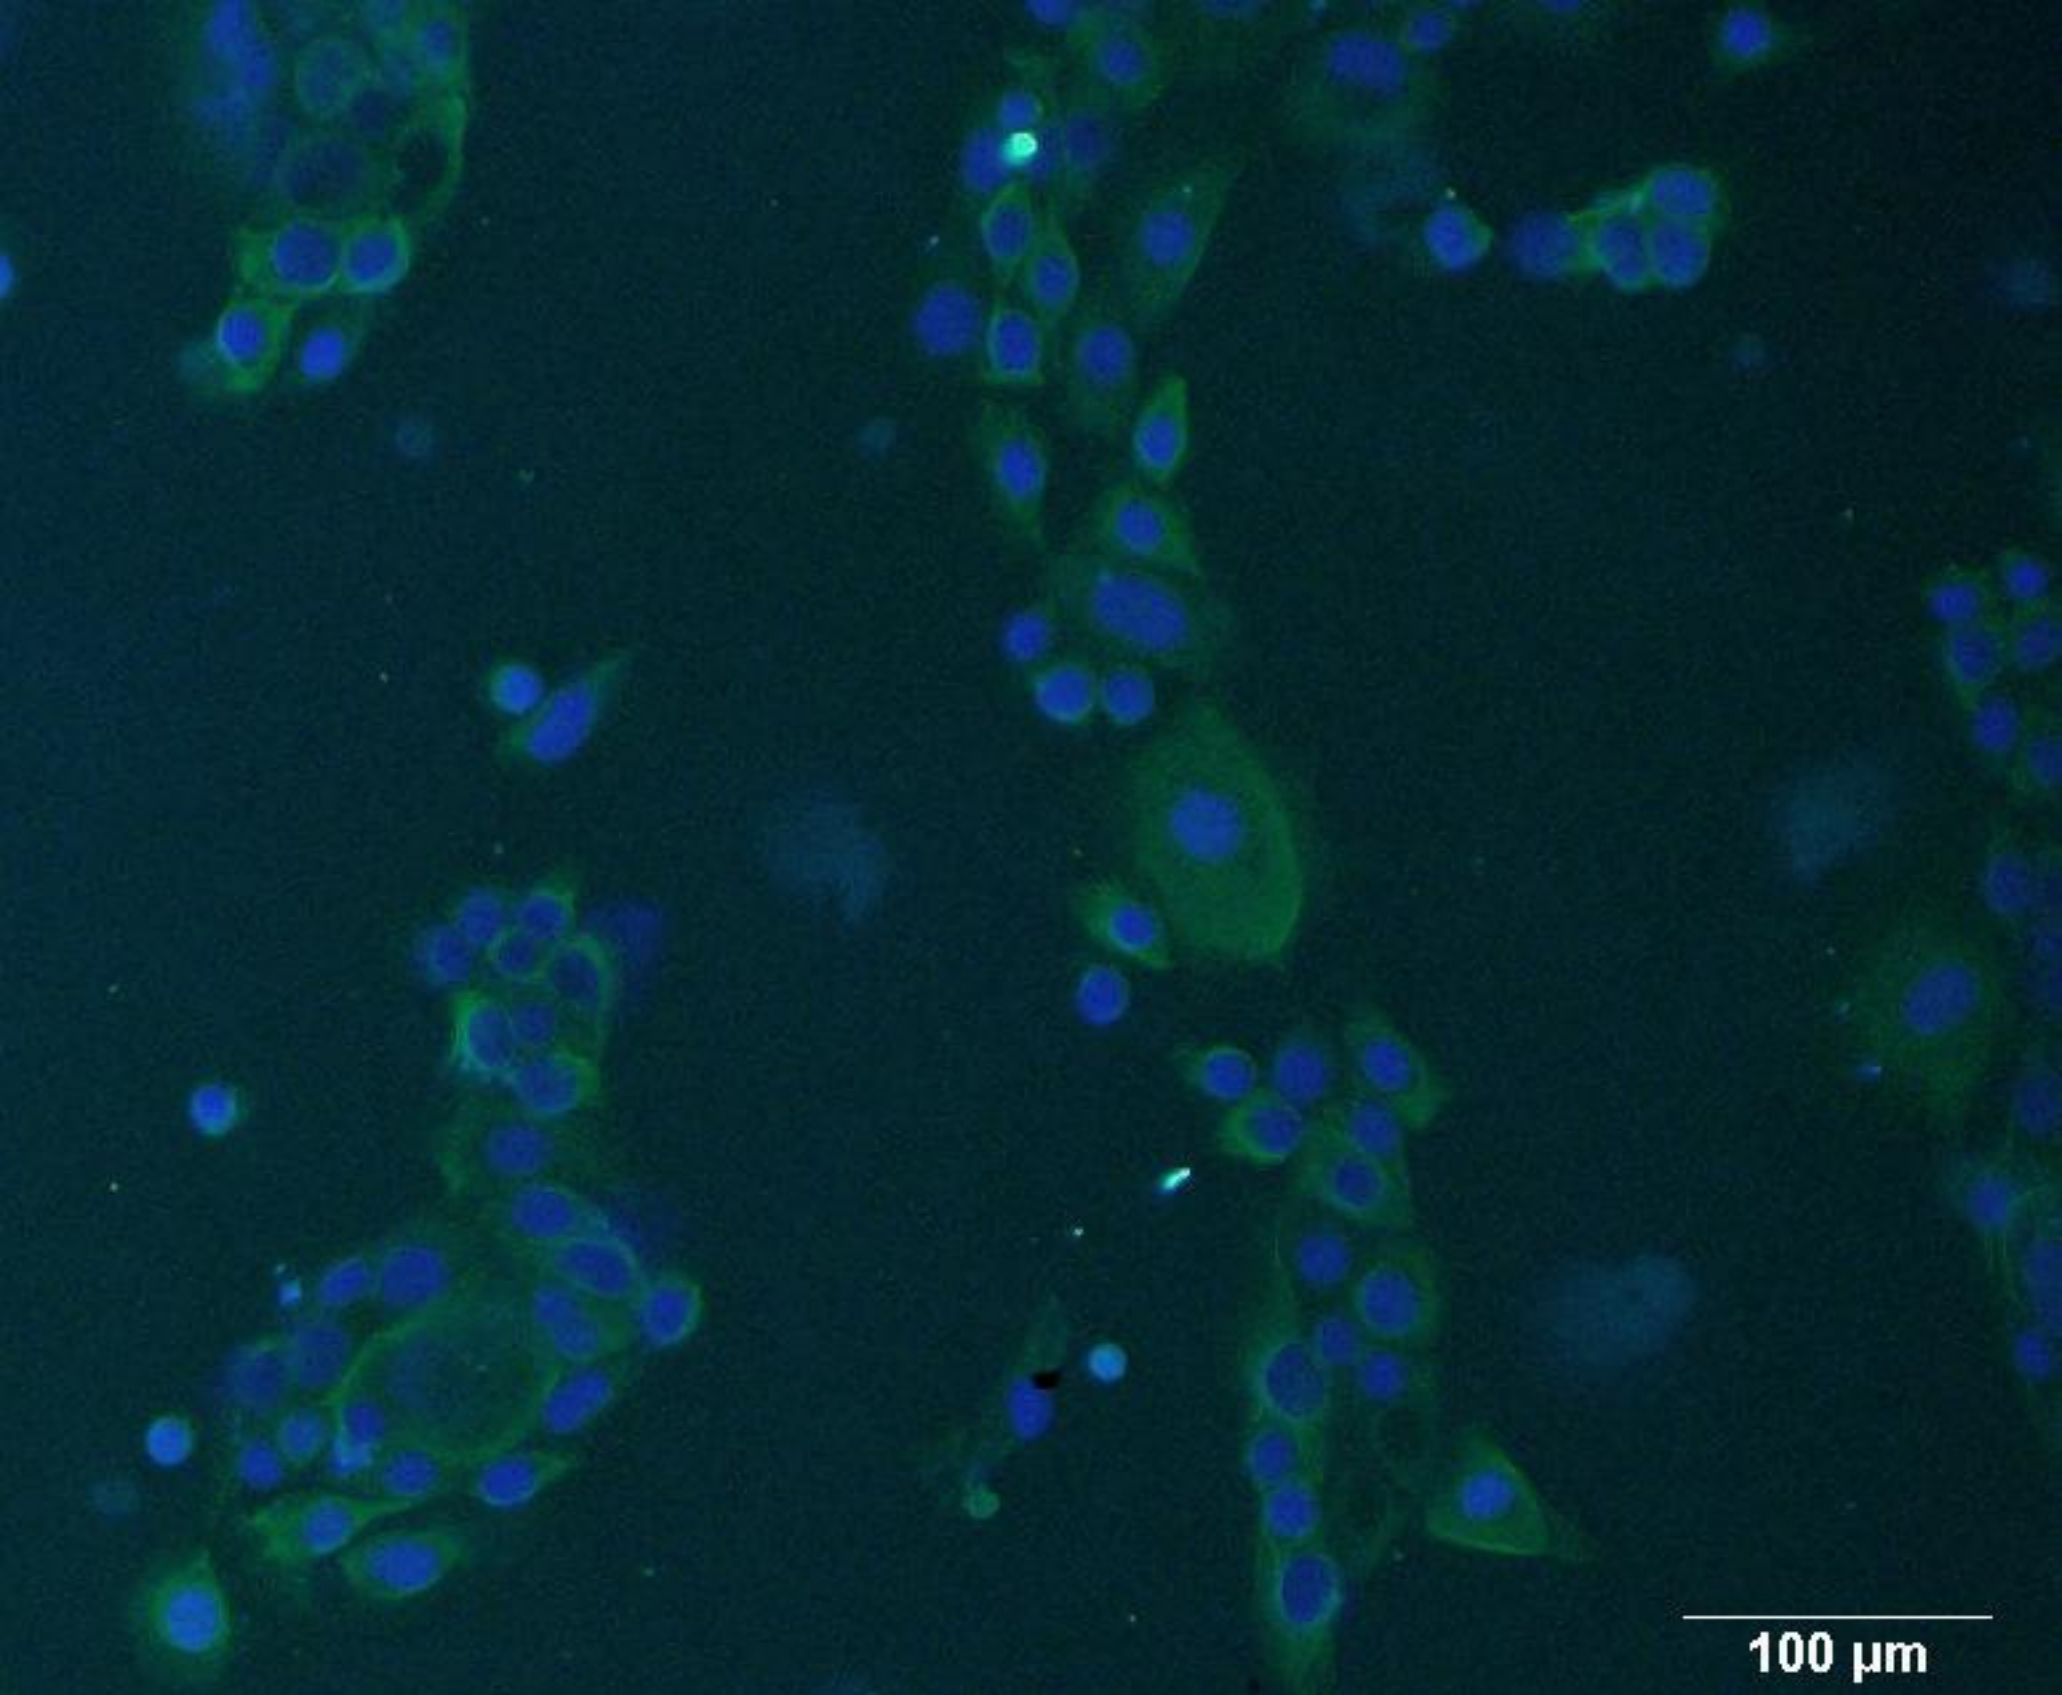

100 μm

Figure



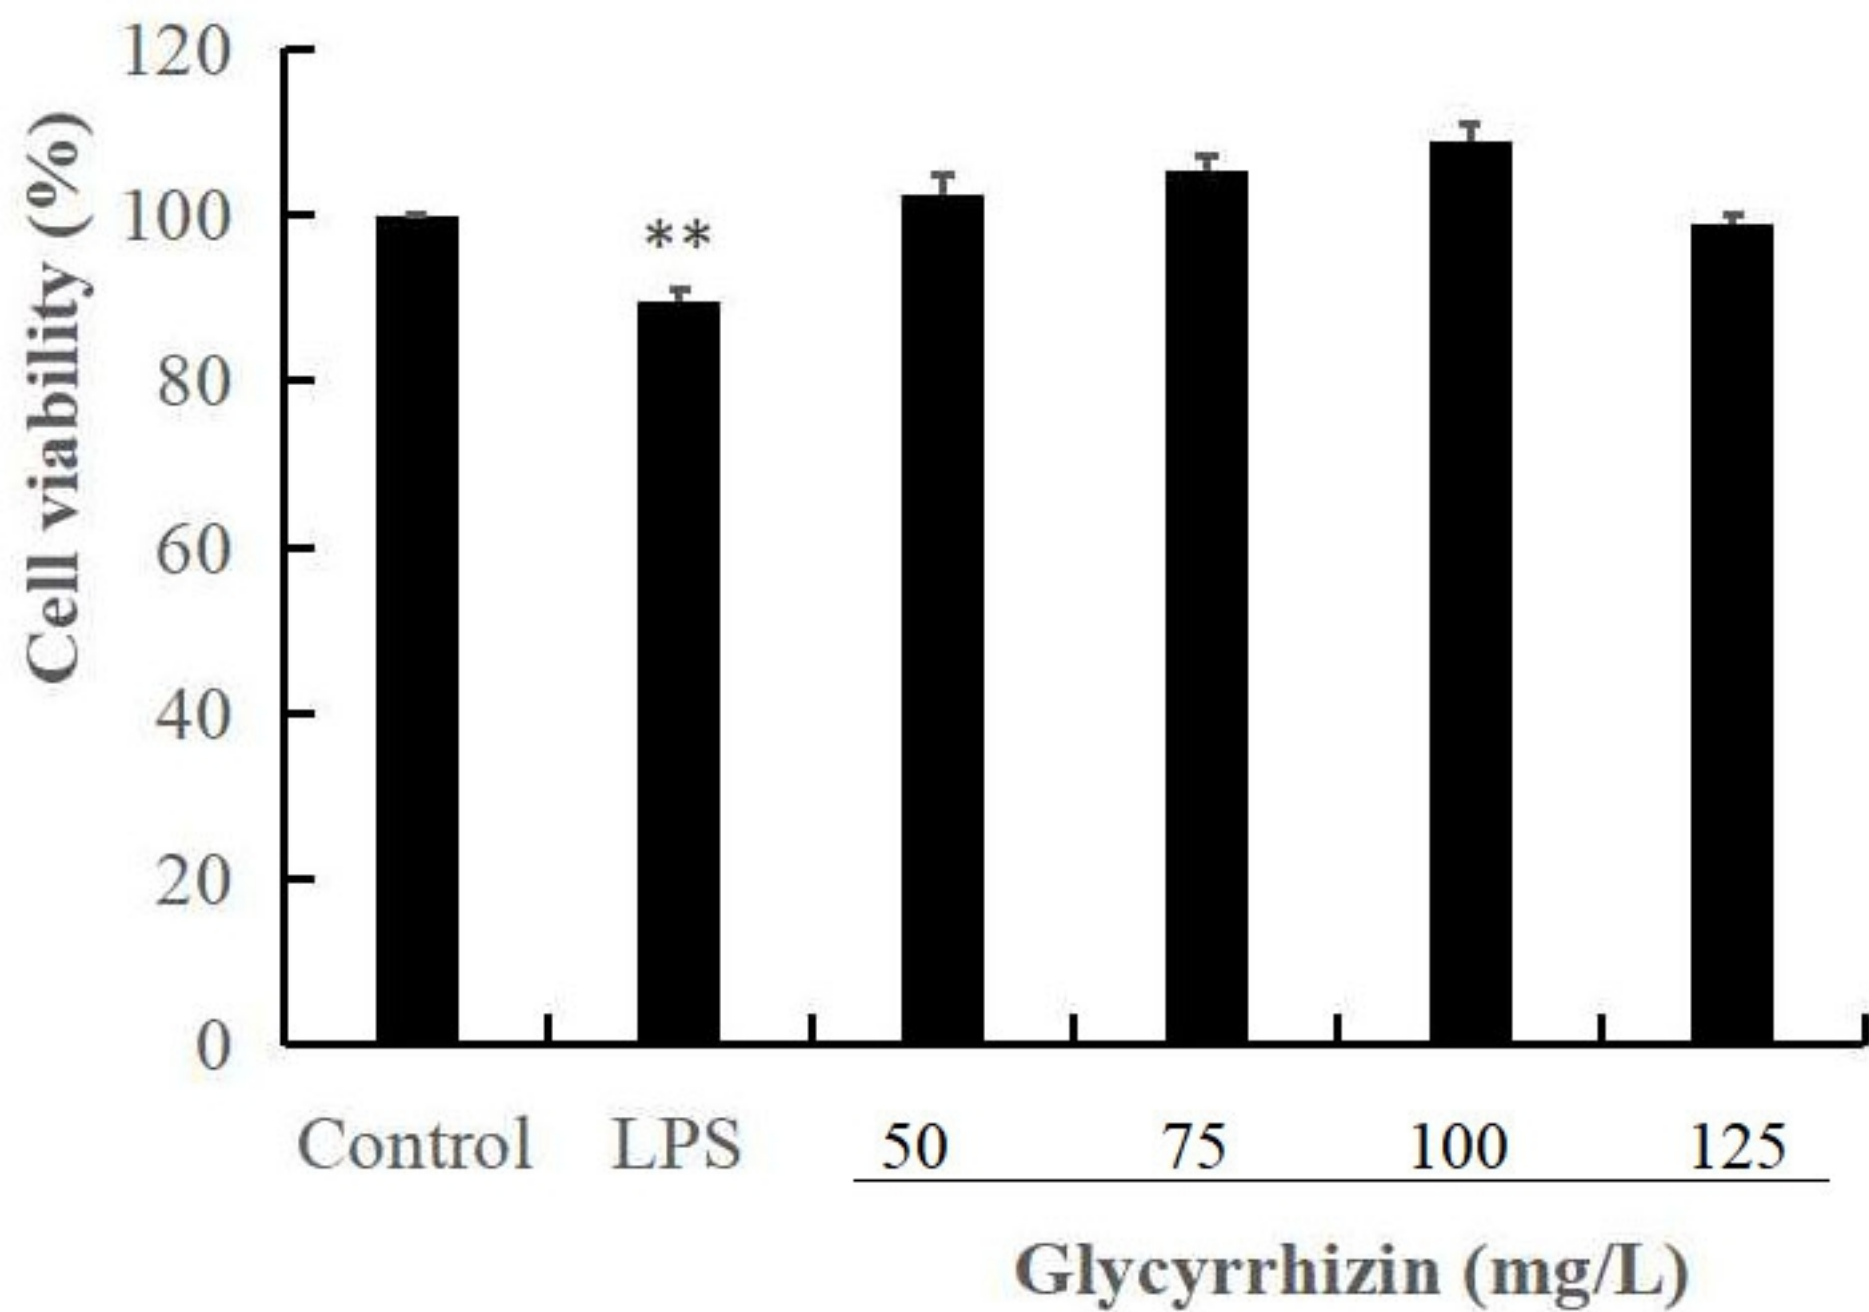

Figure

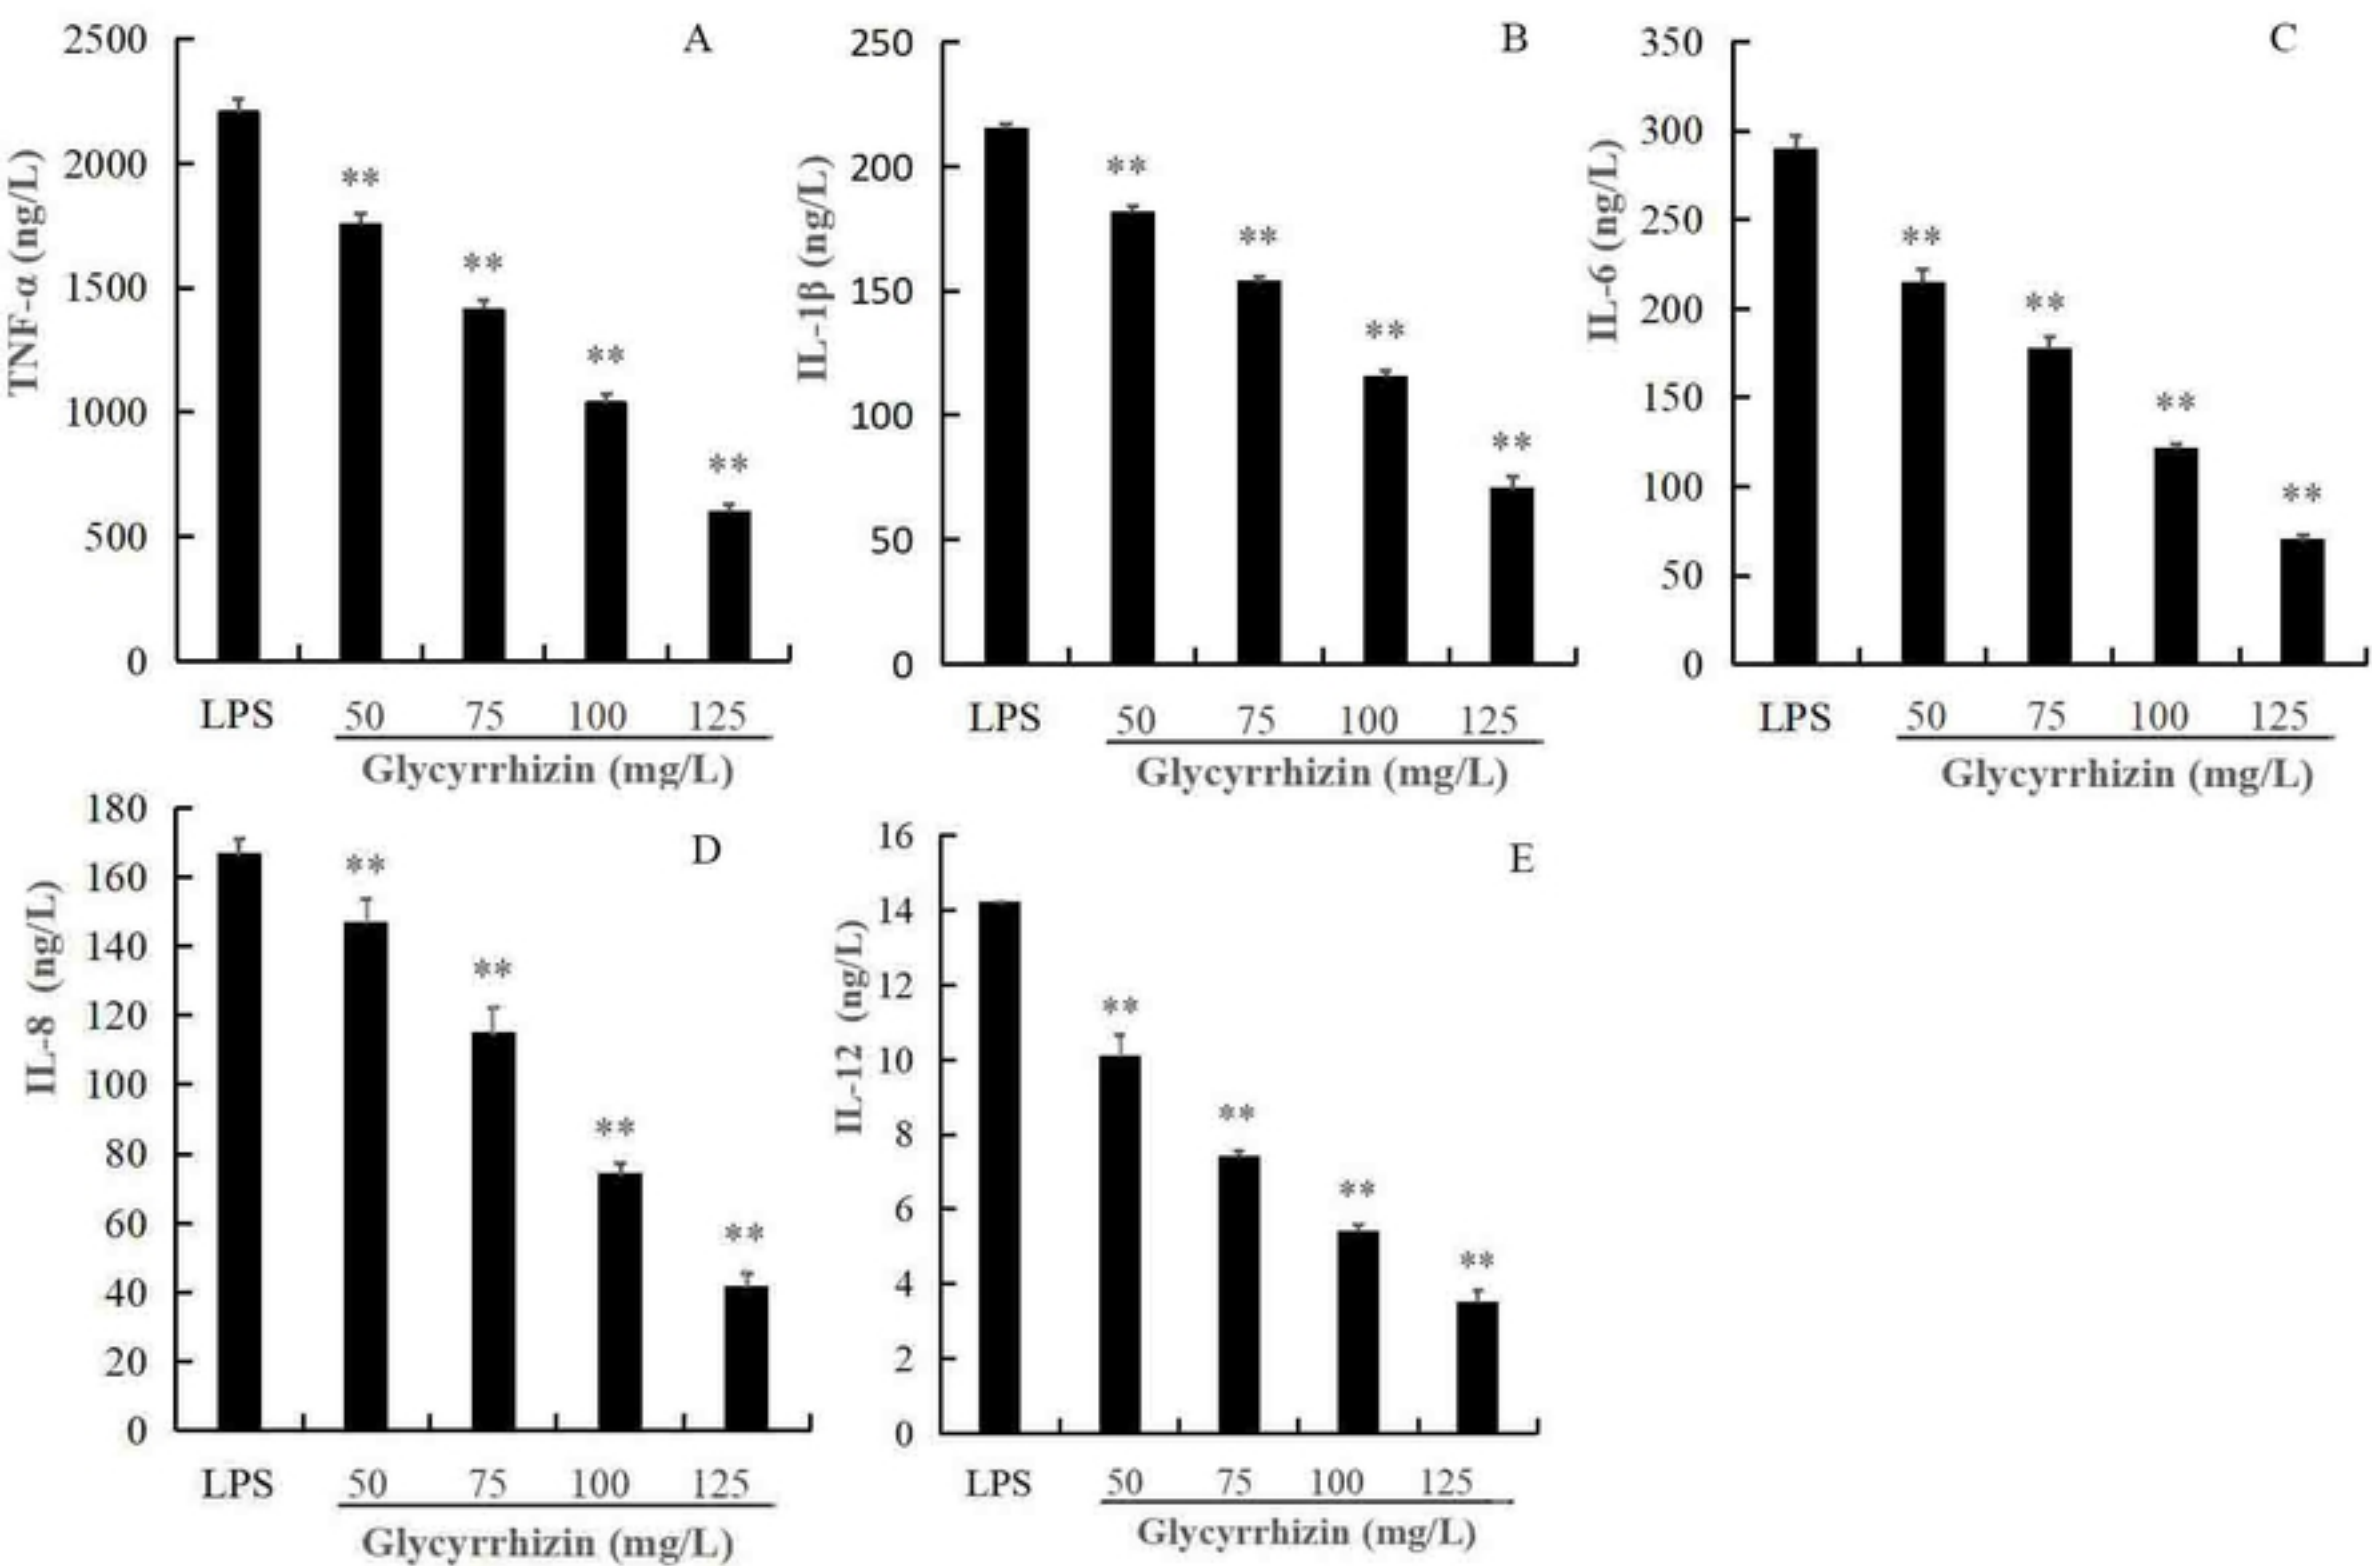

Figure

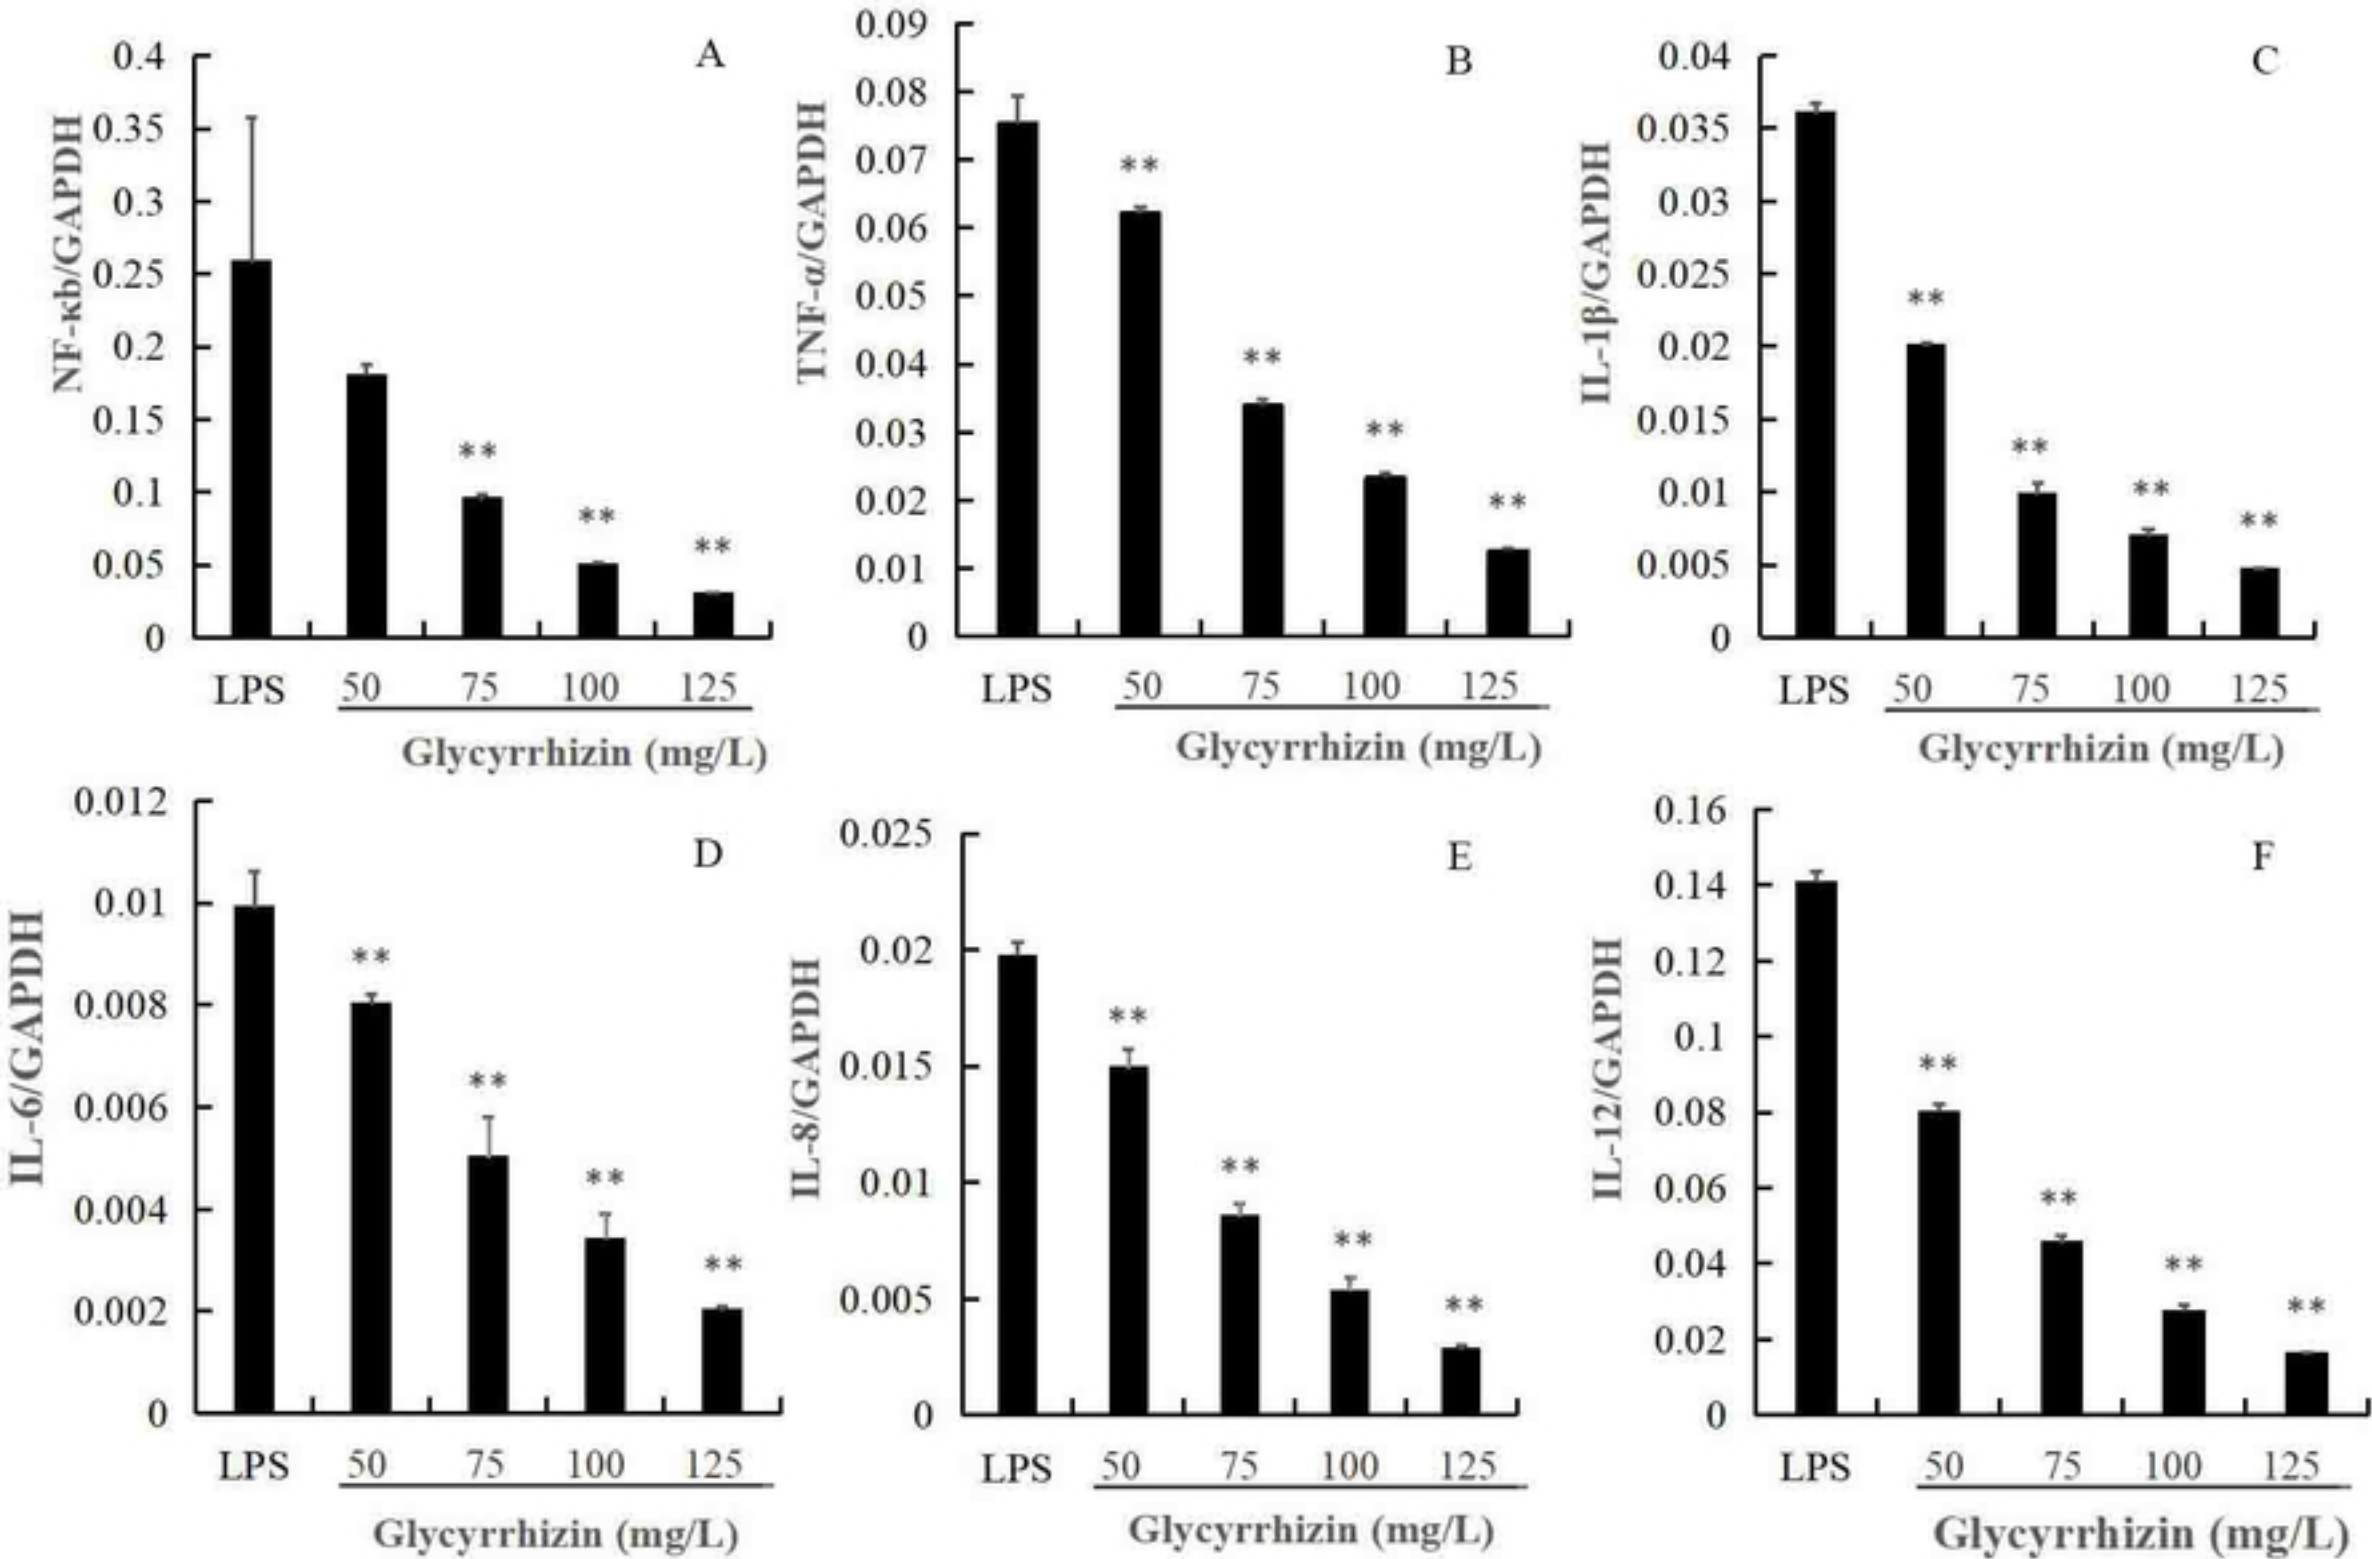

Figure

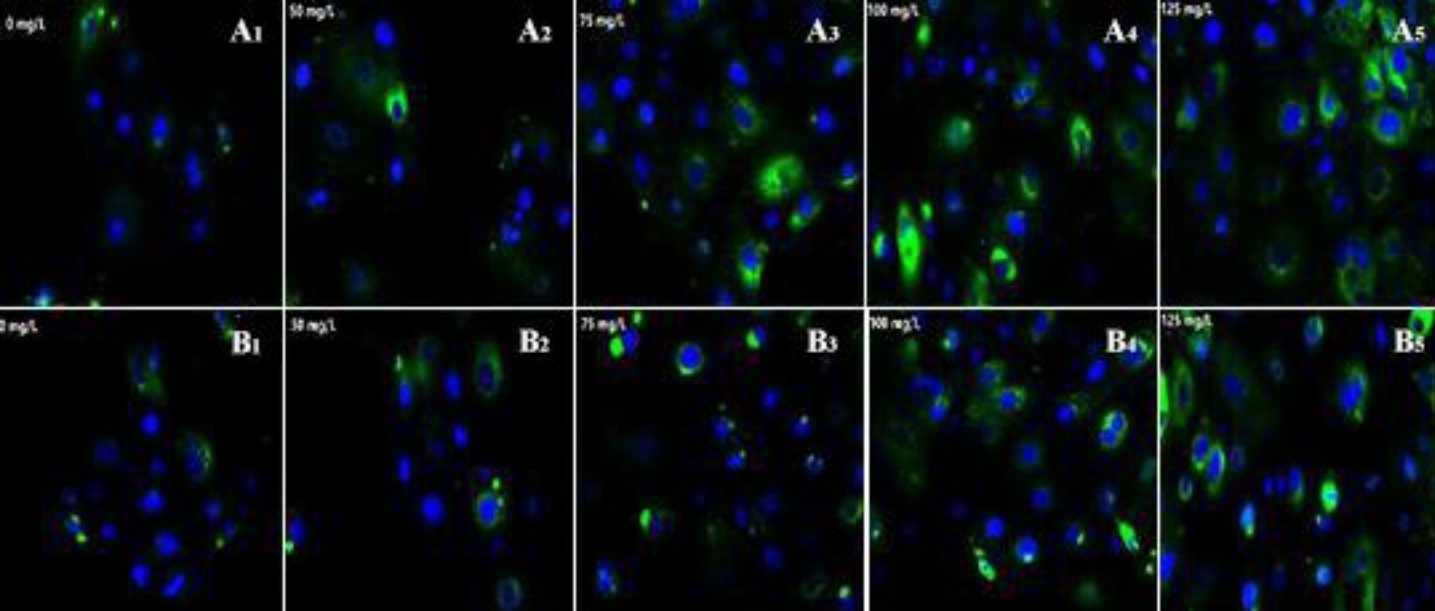

Figure

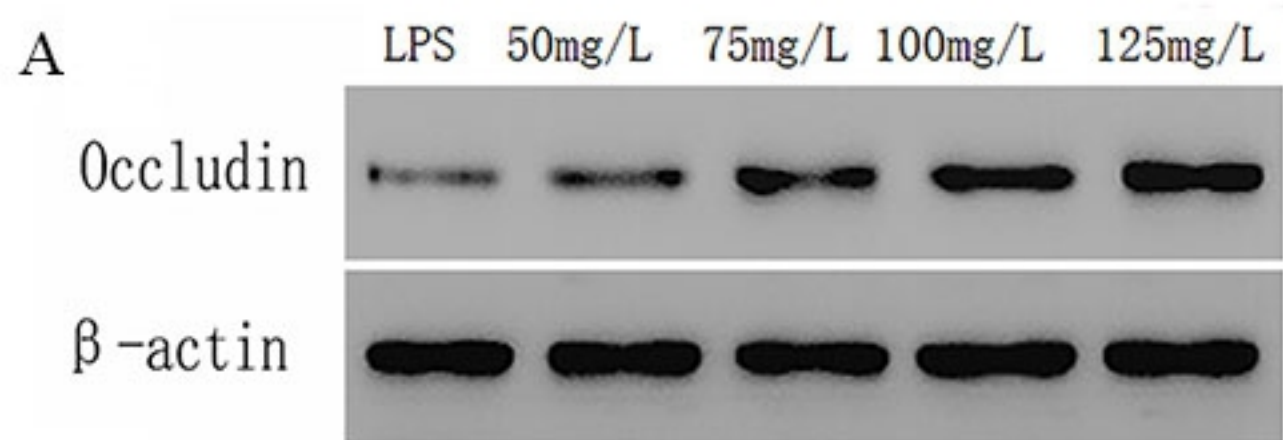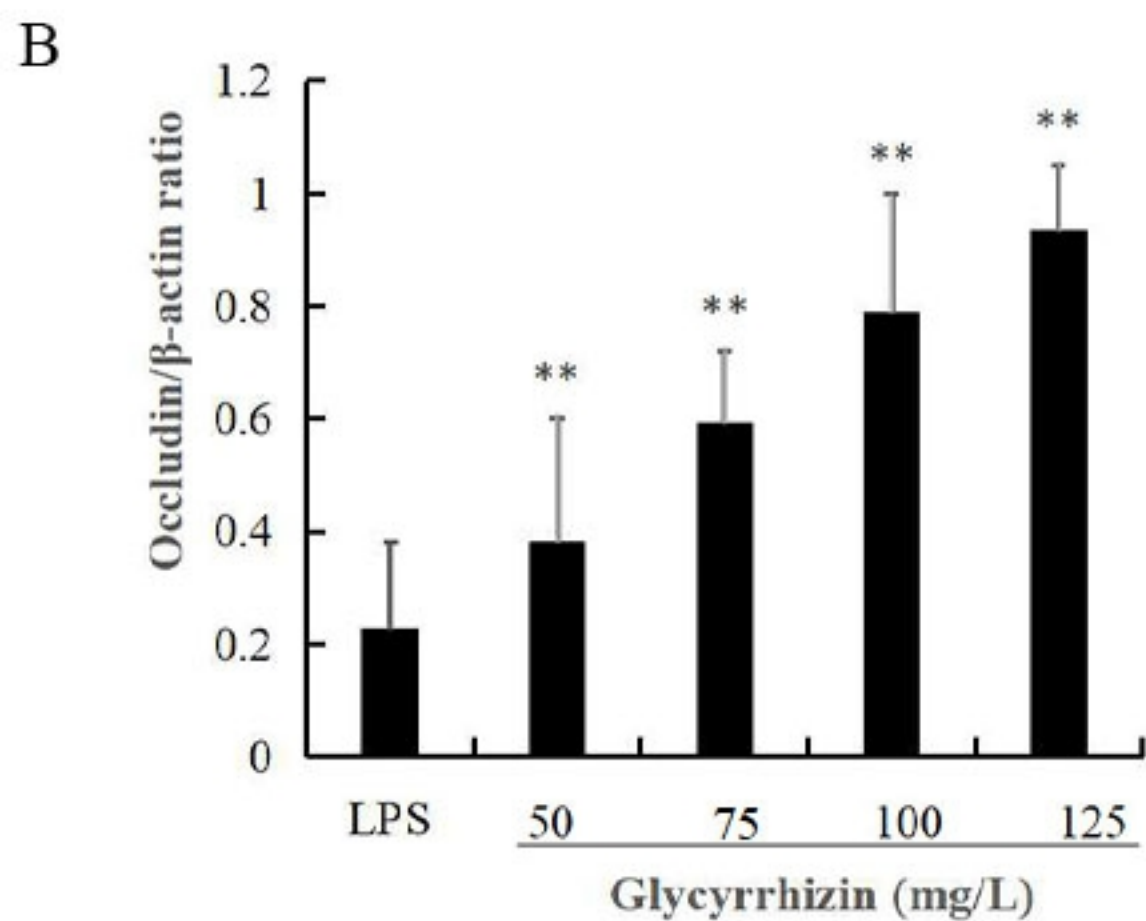

Figure



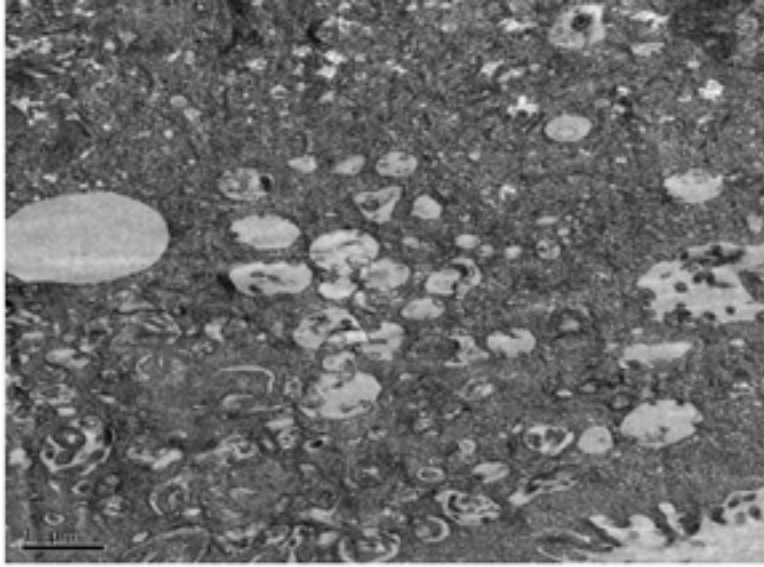

**A HE×10000**

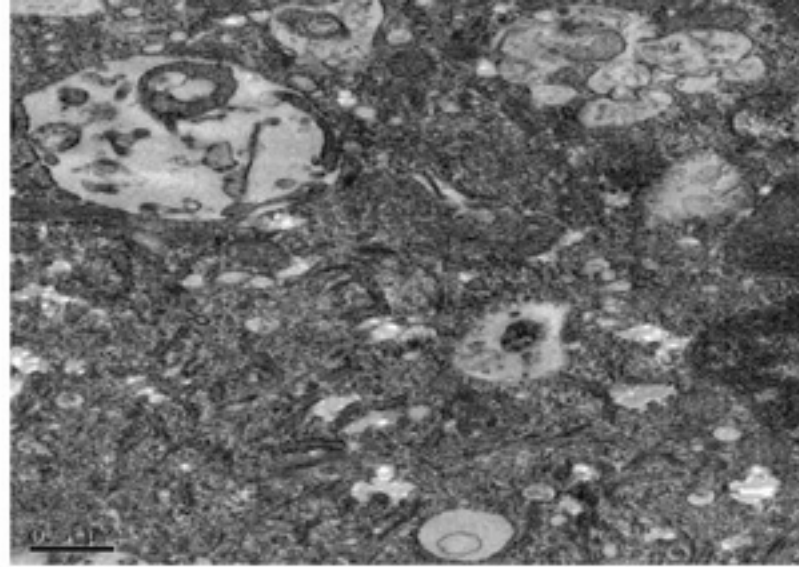

**HE×20000**

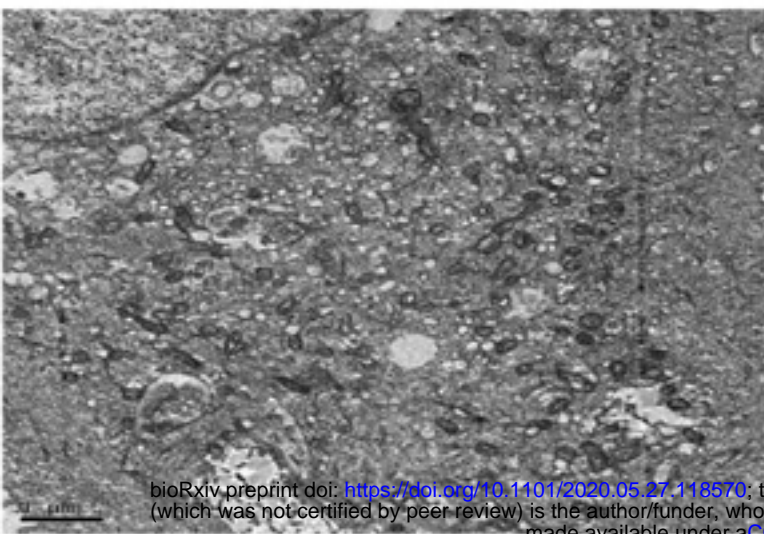

**B HE×10000**

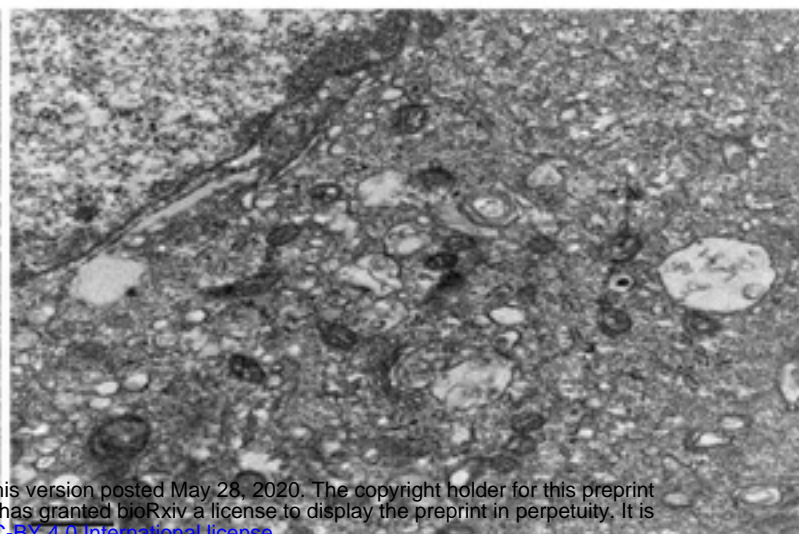

**HE×20000**

bioRxiv preprint doi: <https://doi.org/10.1101/2020.05.27.118570>; this version posted May 28, 2020. The copyright holder for this preprint (which was not certified by peer review) is the author/funder, who has granted bioRxiv a license to display the preprint in perpetuity. It is made available under aCC-BY 4.0 International license.

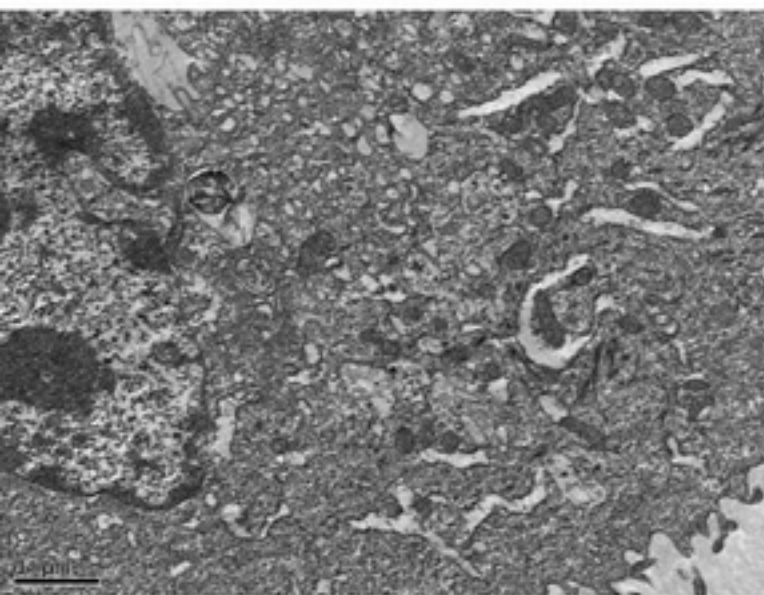

**C HE×10000**

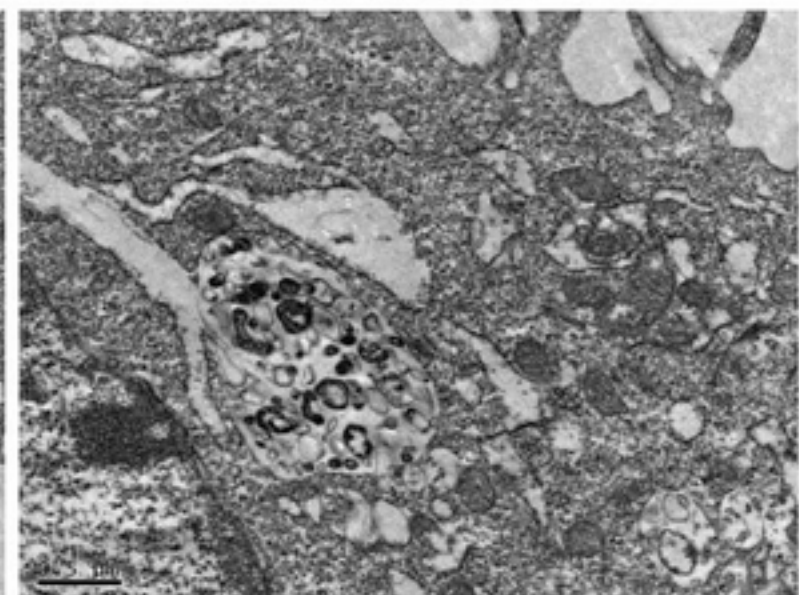

**HE×20000**

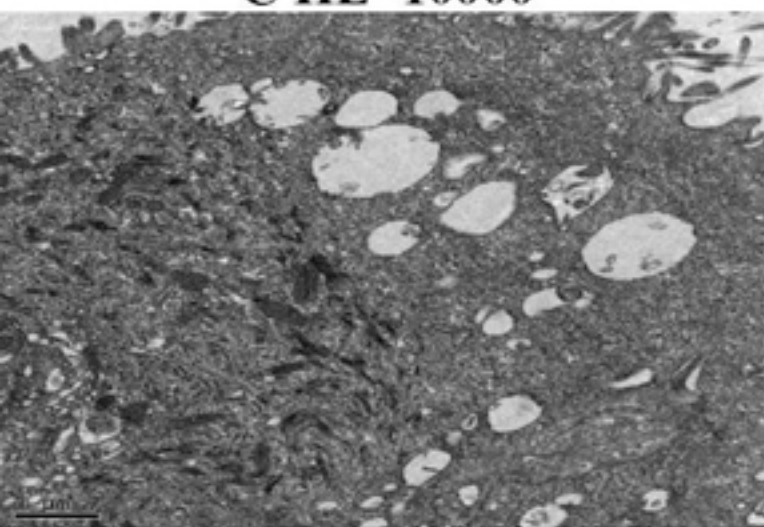

**D HE×10000**

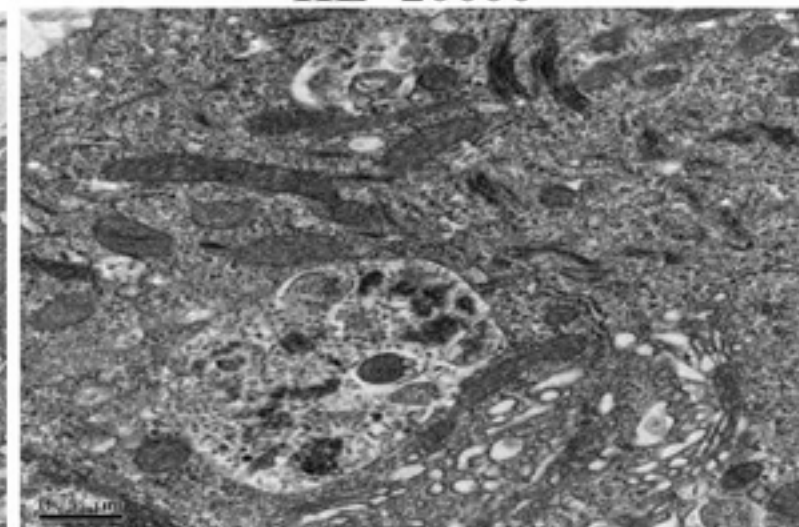

**HE×20000**

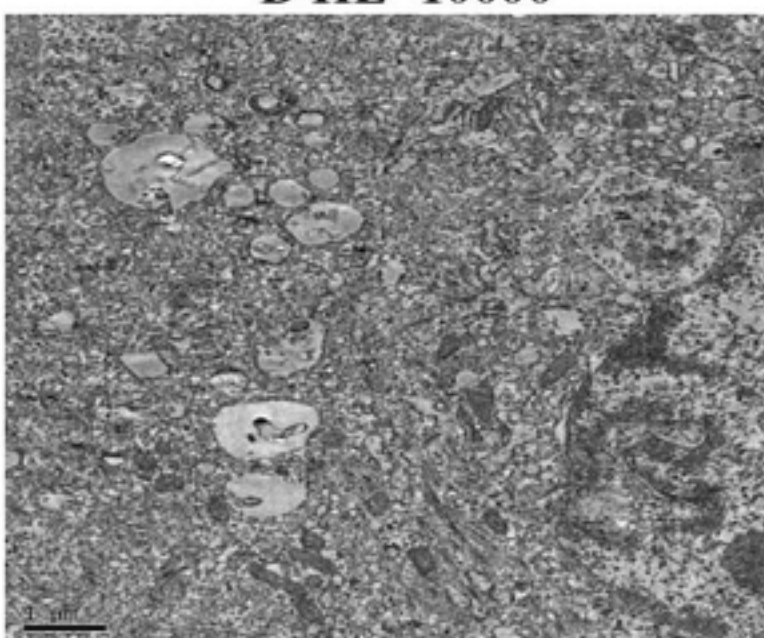

**E HE×10000**

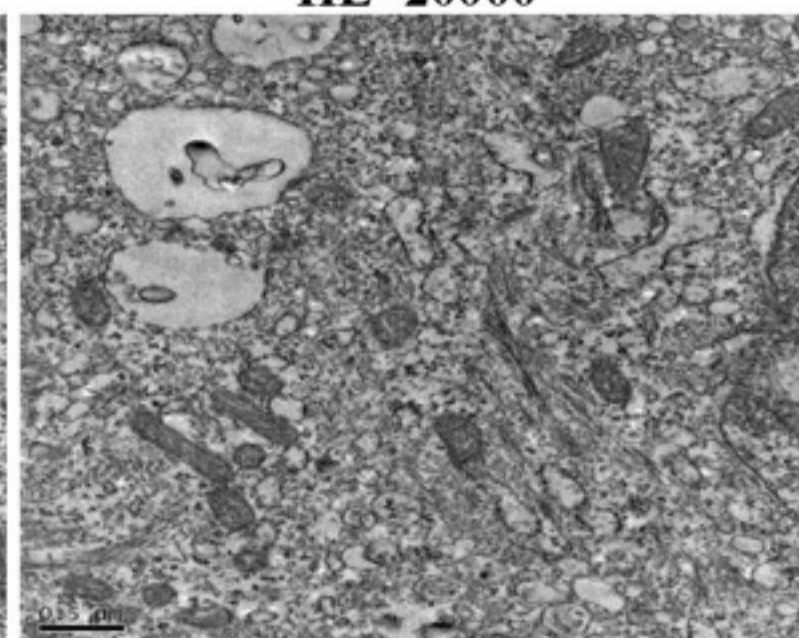

**HE×20000**



1 **Fig. 1.** Immunocytochemistry of purified epithelial cells. Purified epithelial cells were obtained by  
2 digestion, and identified by the detection of cytoskeleton 18.

3 **Fig. 2.** Effects of LPS and glycyrrhizin on cell viability of GRECs. The cell viability was  
4 measured by MTT assay. GRECs were incubated with LPS at the concentration of 50 mg/L, and  
5 glycyrrhizin at the concentration of 0, 50, 75, 100 and 125 mg/L, respectively. The data presented  
6 was the means  $\pm$  S.E.M of three independent experiments. \*\*  $P<0.01$ , \*  $P<0.05$  versus the control  
7 group.

8 **Fig. 3 (A-E).** Effects of glycyrrhizin on LPS-induced inflammatory cytokines. GRECs were  
9 incubated with 50 mg/L of LPS for 2 h, and then glycyrrhizin (0, 50, 75, 100, 125 mg/L) was  
10 added for 24 h. Inflammatory cytokines of TNF- $\alpha$  (A), IL-1 $\beta$  (B), IL-6 (C), IL-8 (D) and IL-12 (E)  
11 were measured by Elisa kits. The data presented were the means  $\pm$  S.E.M of three independent  
12 experiments. \*\*  $P<0.01$ , \*  $P<0.05$  versus LPS group.

13 **Fig. 4 (A-F).** Effects of glycyrrhizin on the relative mRNA expression of NF- $\kappa$ B, TNF- $\alpha$ , IL-1  $\beta$ ,  
14 IL-6, IL-8 and IL-12 in LPS-induced GRECs. GRECs were stimulated with 50 mg/L of LPS for 2  
15 h, and then were incubated with glycyrrhizin (0, 50, 75, 100, 125 mg/L) for 24 h. The relative  
16 mRNA expression of NF- $\kappa$ b (A), TNF- $\alpha$  (B), IL-1 $\beta$  (C), IL-6 (D), IL-8 (E) and IL-12 (F) was  
17 measured by qRT-PCR. The data presented were as the means  $\pm$  S.E.M of three independent  
18 experiments. \*\*  $P<0.01$ , \*  $P<0.05$  versus LPS group.

19 **Fig. 5 (A-B).** Effects of glycyrrhizin on the distribution of Zo-1 and Occludin in LPS-induced  
20 GRECs. GRECs were stimulated with 50 mg/L of LPS for 2 h, and then were incubated with  
21 glycyrrhizin (0, 50, 75, 100, 125 mg/L) for 24 h. The distribution of the Zo-1 (A<sub>1</sub>-A<sub>5</sub>) and

22 Occludin (B<sub>1</sub>-B<sub>5</sub>) was measured by immunofluorescence staining. Fig. 5 (A<sub>1</sub>-A<sub>5</sub>) and Fig. 5  
23 (B<sub>1</sub>-B<sub>5</sub>) represented the LPS group and LPS-induced GRECs treated with glycyrrhizin at the dose  
24 of 50, 75, 100, 125 mg/L, respectively.

25 **Fig. 6 (A-B).** Effects of glycyrrhizin on the expression of Occludin in LPS-induced GRECs.  
26 GRECs were incubated with 50 mg/L of LPS for 2 h, and then were incubated with glycyrrhizin at  
27 0, 50, 75, 100, 125 mg/L for 24 h. The expression of Occludin was measured by Western blot  
28 analysis.  $\beta$ -actin was used as a control, the values presented were the means  $\pm$  S.E.M of three  
29 independent experiments. \*\*  $P < 0.01$ , \*  $P < 0.05$  versus LPS group.

30 **Fig. 7 (A-E).** Effects of glycyrrhizin on morphology of LPS-induced GRECs. GRECs were  
31 incubated with LPS for 2 h, and glycyrrhizin was added at the dose of 0, 50, 75, 100, 125 mg/L  
32 from picture A to E. The autophagy around the nucleus was the highest in fig. A, and it gradually  
33 decreased in fig. C, fig. D and fig. E.
